# Supplementary material for: Assessment of Cimetropium Bromide Use for the Detection of Gastric Neoplasms During Esophagogastroduodenoscopy
Source: PubMed Central journal article supplement (PMC8943631; doi:10.1001/jamanetworkopen.2022.3827), 2022-03-23
Supplement: jamanetwopen-e223827-s001.pdf [file jamanetwopen-e223827-s001.pdf]

## Supplementary Online Content

Kim SY, Park JM, Cho HS, Cho YK, Choi MG. Assessment of cimetropium bromide use for the detection of gastric neoplasms during esophagogastroduodenoscopy. *JAMA Netw Open*. 2022;5(3):e223827. doi:10.1001/jamanetworkopen.2022.3827

**eTable 1.** Baseline Characteristics of Participants According to Endoscopists

**eTable 2.** Odds Ratios From Propensity Score Matching After Multiple Imputation

**eTable 3.** Univariate and Multivariate Logistic Regression Analyses for Factors Associated With Detection of Gastric Neoplasm

This supplementary material has been provided by the authors to give readers additional information about their work.

**eTable 1. Baseline Characteristics of Participants According to Endoscopists**

| Endoscopist                                          | Age, Mean $\pm$ SD | Men, n (%)    | Female, n (%) | BMI, N; Mean $\pm$ SD | Smoking, n (%) | Alcohol drinking, n (%) |
|------------------------------------------------------|--------------------|---------------|---------------|-----------------------|----------------|-------------------------|
| A                                                    | 48.9 $\pm$ 10.3    | 1456 (56.3)   | 1130 (43.7)   | 2556; 23.6 $\pm$ 3.1  | 477 (18.5)     | 929 (35.9)              |
| B                                                    | 48.5 $\pm$ 10.4    | 4009 (53.3)   | 3510 (46.7)   | 7398; 23.6 $\pm$ 3.2  | 1426 (19.0)    | 3788 (50.4)             |
| C                                                    | 47.2 $\pm$ 10.9    | 945 (56.2)    | 737 (43.8)    | 1674; 23.5 $\pm$ 3.3  | 256 (15.2)     | 427 (25.4)              |
| D                                                    | 48.9 $\pm$ 10.8    | 1253 (54.9)   | 1030 (45.1)   | 2230; 23.6 $\pm$ 3.3  | 333 (14.6)     | 1389 (60.8)             |
| E                                                    | 49.0 $\pm$ 10.0    | 1237 (55.1)   | 1007 (44.9)   | 2206; 23.6 $\pm$ 3.1  | 427 (19.0)     | 791 (35.3)              |
| F                                                    | 49.8 $\pm$ 11.4    | 5009 (56.1)   | 3919 (43.9)   | 8774; 23.6 $\pm$ 3.2  | 1955 (21.9)    | 4212 (47.2)             |
| G                                                    | 48.3 $\pm$ 10.7    | 4800 (53.4)   | 4190 (46.6)   | 8863; 23.5 $\pm$ 3.2  | 1664 (18.5)    | 4111 (45.7)             |
| H                                                    | 48.2 $\pm$ 10.9    | 3420 (53.7)   | 2951 (46.3)   | 6271; 23.5 $\pm$ 3.2  | 1184 (18.6)    | 3213 (50.4)             |
| I                                                    | 51.8 $\pm$ 11.2    | 124 (48.1)    | 134 (51.9)    | 258; 23.8 $\pm$ 2.8   | 0 (0.0)        | 0(0.0)                  |
| J                                                    | 48.3 $\pm$ 10.7    | 3723 (53.2)   | 3275 (46.8)   | 6864; 23.5 $\pm$ 3.2  | 1299 (18.6)    | 3457 (49.4)             |
| K                                                    | 48.4 $\pm$ 10.9    | 4695 (54.1)   | 3981 (45.9)   | 8523; 23.6 $\pm$ 3.3  | 1639 (18.9)    | 4048 (46.7)             |
| L                                                    | 50.9 $\pm$ 10.7    | 1207 (56.3)   | 937 (43.7)    | 2111; 23.6 $\pm$ 3.2  | 336 (15.7)     | 611 (28.5)              |
| M                                                    | 48.1 $\pm$ 10.6    | 3189 (51.5)   | 3006 (48.5)   | 6084; 23.4 $\pm$ 3.3  | 1075 (17.4)    | 2943 (47.5)             |
| N                                                    | 47.5 $\pm$ 11.0    | 1450 (51.6)   | 1359 (48.4)   | 2774; 23.5 $\pm$ 3.3  | 400 (14.2)     | 1096 (39.0)             |
| Types of endoscopist (observation time) <sup>a</sup> |                    |               |               |                       |                |                         |
| Fast ( $\leq$ 2:51 min, n=8)                         | 49.2 $\pm$ 1.5     | 18 797 (54.3) | 17 408 (45.6) | 23.6 $\pm$ 0.1        | 7154 (18.7)    | 17 751 (46.5)           |
| Slow ( $>$ 2:51 min, n=6)                            | 48.4 $\pm$         | 17 720        | 13            | 23.5 $\pm$ 0.1        | 5317           | 13 264                  |

|                                                                                                                                                                                                         |      |        |               |      |        |        |
|---------------------------------------------------------------------------------------------------------------------------------------------------------------------------------------------------------|------|--------|---------------|------|--------|--------|
|                                                                                                                                                                                                         | 0.6  | (53.6) | 758<br>(46.6) |      | (18.0) | (45.0) |
| <i>P</i>                                                                                                                                                                                                | .439 | .008   |               | .519 | < .001 | < .001 |
| <p><i>P</i> values were calculated using Wilcoxon rank sum test or chi-square.<br/> Abbreviations: BMI, body mass index; SD, standard deviation.<br/> <sup>a</sup> dichotomized using median value.</p> |      |        |               |      |        |        |

**eTable 2.** Odds Ratios From Propensity Score Matching After Multiple Imputation

We conducted the multiple imputations to account for missing values for BMI, smoking, alcohol drinking, family history of gastric cancer, *H. pylori* infection, and diabetes mellitus. Multiple imputation using fully conditional specification (FCS) was used to replace missing data and imputation model included all predict variables and total gastric neoplasms. We generated 50 imputation data sets and number of imputations were sufficient. [Fraction Missing Information (FMI) was 0.16, and  $\geq 100 \times$  FMI]. Rubin's rule was used to combine the multiple imputed estimates.

|                                                                                         | Cimetropium bromide |           | OR (95% CI)      | <i>P</i> value |
|-----------------------------------------------------------------------------------------|---------------------|-----------|------------------|----------------|
|                                                                                         | Users               | Non-users |                  |                |
| Total gastric neoplasms                                                                 |                     |           |                  |                |
| PSM (n=47 174) -1 imputed dataset                                                       | 70 (0.30)           | 43 (0.18) | 1.63 (1.11-2.38) | .012           |
| PSM (n=47 128) -10 imputed dataset                                                      | 74 (0.31)           | 40 (0.17) | 1.85 (1.26-2.71) | .002           |
| PSM (n=47 278) -20 imputed dataset                                                      | 75 (0.32)           | 44 (0.19) | 1.71 (1.18-2.48) | .005           |
| PSM (n=47 270) -30 imputed dataset                                                      | 73 (0.31)           | 43 (0.18) | 1.70 (1.17-2.47) | .005           |
| PSM (n=47 220) -40 imputed dataset                                                      | 75 (0.32)           | 43 (0.18) | 1.75 (1.20-2.54) | .004           |
| PSM (n=47 232) -50 imputed dataset                                                      | 72 (0.30)           | 46 (0.19) | 1.57 (1.08-2.26) | .017           |
| Pooled                                                                                  |                     |           | 1.55 (1.03-2.33) | .036           |
| Abbreviations: OR, odds ratio; CI, confidence interval; PSM, propensity score-matching. |                     |           |                  |                |

**eTable 3.** Univariate and Multivariate Logistic Regression Analyses for Factors Associated With Detection of Gastric Neoplasm

|                                      | Univariate          |                | Multivariate <sup>c</sup> |                |
|--------------------------------------|---------------------|----------------|---------------------------|----------------|
|                                      | OR (95% CI)         | <i>P</i> value | Adjust OR (95% CI)        | <i>P</i> value |
| Age, year                            |                     |                |                           |                |
| 31-39                                | 1                   |                | 1                         |                |
| 40-59                                | 2.93 (1.49-5.77)    | .002           | 1.88 (0.96-3.69)          | .068           |
| 60-79                                | 11.21 (5.70-22.07)  | < .001         | 4.78 (2.35-9.70)          | < .001         |
| ≥80                                  | 62.63 (25.24-155.4) | < .001         | 22.27 (8.44-58.75)        | < .001         |
| Sex                                  |                     |                |                           |                |
| Men                                  | 2.11 (1.50-2.96)    | < .001         | 2.07 (1.41-3.03)          | < .001         |
| Women                                | 1                   |                | 1                         |                |
| Body mass index (kg/m <sup>2</sup> ) |                     |                |                           |                |
| <18.5                                | 1.78 (0.97-3.29)    | .064           | 2.69 (1.46-4.97)          | .002           |
| 18.5–24.9                            | 1                   |                | 1                         |                |
| 25–29.9                              | 0.91 (0.63-1.32)    | .607           | 0.74 (0.51-1.07)          | .108           |
| ≥30                                  | 0.89 (0.35-2.29)    | .808           | 0.99 (0.39-2.49)          | .985           |
| Unknown                              | 2.55 (1.15-5.64)    | .021           | 1.76 (0.75-4.16)          | .195           |
| Smoking                              |                     |                |                           |                |
| No                                   | 1                   |                | 1                         |                |
| Yes                                  | 1.55 (1.03-2.33)    | .037           | 1.42 (0.92-2.20)          | .114           |
| Unknown                              | 1.15 (0.80-1.64)    | .442           | 1.61 (0.68-3.81)          | .281           |
| Alcohol drinking                     |                     |                |                           |                |
| No                                   | 1                   |                | 1                         |                |
| Yes                                  | 0.82 (0.57-1.19)    | .295           | 0.80 (0.53-1.19)          | .261           |
| Unknown                              | 0.93 (0.62-1.40)    | .744           | 0.70 (0.43-1.15)          | .156           |
| Family history of gastric cancer     |                     |                |                           |                |
| No                                   | 1                   |                | 1                         |                |
| First degree                         | 1.28 (0.67-2.44)    | .449           | 1.08 (0.57-2.02)          | .816           |
| Other relatives                      | 1.00 (0.39-2.59)    | .997           | 1.41 (0.56-3.58)          | .469           |
| Unknown                              | 1.01 (0.73-1.40)    | .942           | 1.78 (0.74-4.30)          | .198           |
| <i>H. pylori</i> infection           |                     |                |                           |                |
| No                                   | 1                   |                | 1                         |                |
| Yes                                  | 4.01 (2.44-6.61)    | < .001         | 2.12 (1.29-3.49)          | .003           |
| Unknown                              | 1.90 (1.15-3.15)    | .013           | 1.72 (1.01-2.93)          | .045           |
| Grade of atrophic gastritis          |                     |                |                           |                |
| No                                   | 1                   |                | 1                         |                |

|                                                                                                                                                                                                                                          |                     |        |                   |        |
|------------------------------------------------------------------------------------------------------------------------------------------------------------------------------------------------------------------------------------------|---------------------|--------|-------------------|--------|
| Yes                                                                                                                                                                                                                                      | 4.39 (2.85-6.76)    | < .001 | 2.90 (1.86-4.50)  | < .001 |
| Unknown                                                                                                                                                                                                                                  | 22.00 (14.22-34.06) | < .001 | 9.68 (6.03-15.54) | < .001 |
| Diabetes mellitus                                                                                                                                                                                                                        |                     |        |                   |        |
| No                                                                                                                                                                                                                                       | 1                   |        | 1                 |        |
| Yes                                                                                                                                                                                                                                      | 1.36 (0.65-2.87)    | .417   | 0.56 (0.27-1.16)  | .12    |
| Unknown                                                                                                                                                                                                                                  | 0.92 (0.67-1.28)    | .635   | 0.52 (0.25-1.10)  | .088   |
| Type of endoscopist (observation time) <sup>a</sup>                                                                                                                                                                                      |                     |        |                   |        |
| Fast ( $\leq$ 2:51 min, median)                                                                                                                                                                                                          | 1                   |        | 1                 |        |
| Slow ( $>$ 2:51 min, median)                                                                                                                                                                                                             | 1.36 (1.00-1.85)    | .051   | 1.51 (1.11-2.06)  | .009   |
| Type of endoscopist (biopsy rate) <sup>b</sup>                                                                                                                                                                                           |                     |        |                   |        |
| Low ( $\leq$ 18.4%, median)                                                                                                                                                                                                              | 1                   |        | 1                 |        |
| High ( $>$ 18.4%, median)                                                                                                                                                                                                                | 1.43 (1.03-1.97)    | .032   | 1.59 (1.15-2.19)  | .005   |
| Use of midazolam                                                                                                                                                                                                                         |                     |        |                   |        |
| No                                                                                                                                                                                                                                       | 1                   |        | 1                 |        |
| Yes                                                                                                                                                                                                                                      | 0.91 (0.66-1.25)    | .562   | 1.31 (0.94-1.83)  | .116   |
| Use of cimetropium bromide                                                                                                                                                                                                               |                     |        |                   |        |
| No                                                                                                                                                                                                                                       | 1                   |        | 1                 |        |
| Yes                                                                                                                                                                                                                                      | 1.66 (1.22-2.27)    | .001   | 1.54 (1.11-2.13)  | .009   |
| Abbreviations: OR, odds ratio; CI, confidence interval.<br><sup>a</sup> Dichotomized using median value of observation time.<br><sup>b</sup> Dichotomized using median value of biopsy rate.<br><sup>c</sup> All variables were included |                     |        |                   |        |
